# Supplementary material for: Perspectives in the Development of Tools to Assess Vaccine Literacy
Source: MDPI journal article supplement (doi:10.3390/vaccines12040422), 2024-04-16
Supplement: s1 [file s1]

## Development of Tools to Assess Vaccine Literacy: a Scoping Review and Future Perspectives

### Supplementary material

Variables' psychological glossary considered for building the framework

| Term                 | APA definition ( <a href="https://www.apa.org/">https://www.apa.org/</a> )                                                                                                                                                                                                                            | Common definitions reported in literature                                                                        |
|----------------------|-------------------------------------------------------------------------------------------------------------------------------------------------------------------------------------------------------------------------------------------------------------------------------------------------------|------------------------------------------------------------------------------------------------------------------|
| <b>Ability</b>       | existing competence or skill to perform a specific physical or mental act. Although ability may be either innate or developed through experience, it is distinct from capacity to acquire competence                                                                                                  | innate potential to perform mental and physical actions or tasks                                                 |
| <b>Attitude</b>      | relatively enduring and general evaluation of an object, person, group, issue, or concept on a dimension ranging from negative to positive. Attitudes provide summary evaluations of target objects and are often assumed to be derived from specific beliefs, emotions, and past behaviors           | internal construct within an individual's mind which reflects thoughts, beliefs, emotions and evaluation         |
| <b>Behavior</b>      | any action or function that can be objectively observed in response to controlled stimuli.                                                                                                                                                                                                            | external manifestation that can be observed by others and reflects an individual's actions in the external world |
| <b>Belief</b>        | acceptance of the truth, reality, or validity of something (e.g., a person's veracity), particularly in the absence of substantiation.                                                                                                                                                                | descriptive thought that persons hold about something                                                            |
| <b>Capacity</b>      | maximum ability of an individual to receive or retain information and knowledge or to function in mental or physical tasks.                                                                                                                                                                           | an individual's mental or physical ability                                                                       |
| <b>Competencies</b>  | -                                                                                                                                                                                                                                                                                                     | knowledge, skills, abilities, and behaviors that contribute to individual and organizational performance         |
| <b>Emotion</b>       | complex reaction pattern, involving experiential, behavioral, and physiological elements, by which an individual attempts to deal with a personally significant matter or event. Emotion typically involves feeling but differs from feeling in having an overt or implicit engagement with the world | strong feeling deriving from one's circumstances, mood, or relationships with others                             |
| <b>Feeling</b>       | self-contained phenomenal experience, subjective, evaluative, and independent of the sensations, thoughts, or images evoking it Feelings differ from emotions in being purely mental, whereas emotions are designed to engage with the world                                                          | subjective, evaluative, and independent of the sensations, thought                                               |
| <b>Knowledge</b>     | the state of being familiar with something or aware of its existence, usually resulting from experience or study                                                                                                                                                                                      | information learned through experience, study or investigation                                                   |
| <b>Motivation</b>    | a person's willingness to exert physical or mental effort in pursuit of a goal or outcome                                                                                                                                                                                                             | internal and external: process that initiates, guides, and maintains goal-oriented behaviors                     |
| <b>Perception</b>    | the process or result of becoming aware of objects, relationships, and events by means of the senses, which including such activities as recognizing, observing, and discriminating                                                                                                                   |                                                                                                                  |
| <b>Self-efficacy</b> | an individual's subjective perception of their capability to perform in a given setting or to attain desired results, proposed by Albert Bandura as a primary determinant of emotional and motivational states and behavioral change.                                                                 | individual's belief in their own ability to successfully complete tasks, achieve goals, and handle challenges    |
| <b>Skill</b>         | an ability or proficiency acquired through training and practice.                                                                                                                                                                                                                                     | the result of repeatedly applying knowledge or ability                                                           |

GLM MEDIATION MODEL applied on the data set of the 2020 survey (N=885);  
 Gallucci, M. (2020). jAMM: jamovi Advanced Mediation Models.- <https://jamovi-amm.github.io>

*LEGENDA OF ITEMS INTRODUCED IN THE MEDIATION MODEL AND PCA OF 2020 SURVEY DATA (N=885)[17]*

|                                                                                                                  |                                                                                             |
|------------------------------------------------------------------------------------------------------------------|---------------------------------------------------------------------------------------------|
| <b>FUVL ITEMS - When reading or listening to information about future Covid-19 vaccines or current vaccines:</b> |                                                                                             |
| ITEM1=                                                                                                           | Did you find words you didn't know?                                                         |
| ITEM2=                                                                                                           | Did you find that the texts were difficult to understand?                                   |
| ITEM3=                                                                                                           | Did you need much time to understand them?                                                  |
| ITEM4=                                                                                                           | Did you or would you need someone to help you understand them?                              |
| FUVLNOM= Functional VL nominal scale                                                                             |                                                                                             |
| <b>ICVL ITEMS - When looking for information about future Covid-19 vaccines or current vaccines:</b>             |                                                                                             |
| ITEM5=                                                                                                           | Have you consulted more than one source of information?                                     |
| ITEM 6=                                                                                                          | Did you find the information you were looking for?                                          |
| ITEM 7=                                                                                                          | Have you had the opportunity to use the information?                                        |
| ITEM 8=                                                                                                          | Did you discuss what you understood about vaccinations with your doctor or other people?    |
| ITEM 9=                                                                                                          | Did you consider whether the information collected was about your condition?                |
| ITEM 10=                                                                                                         | Have you considered the credibility of the sources?                                         |
| ITEM 11=                                                                                                         | Did you check whether the information was correct?                                          |
| ITEM 12=                                                                                                         | Did you find any useful information to make a decision on whether or not to get vaccinated? |
| ICVLNOM= Interactive-critical VL nominal scale                                                                   |                                                                                             |
| <b>BELIEFS ABOUT VACCINATION – about general vaccination</b>                                                     |                                                                                             |
| 1)                                                                                                               | BEL1EF1 / CONF IDENCE - 'I am not favorable to vaccines because they are unsafe'            |
| 2)                                                                                                               | BELIEF2 / COMP LACENCY - 'There is no need to vaccinate because natural immunity exists'    |
| <b>Attitudes (QUESTions) – ABOUT Covid-19 vaccines</b>                                                           |                                                                                             |
| 1)                                                                                                               | QUE1 Will be possible to produce safe and efficacious vaccines?                             |
| 2)                                                                                                               | QUE2 / INT ENTION - Will you get vaccinated, if possible?                                   |
| 3)                                                                                                               | QUE3 Will Health Authorities succeed in vaccinating the entire population?                  |
| 4)                                                                                                               | QUE4 / CONV ENIENCE - Would you pay a fee to be vaccinated?                                 |
| 5)                                                                                                               | QUE5CHI -Should children be vaccinated too?                                                 |
| <b>Demographics and outcome</b>                                                                                  |                                                                                             |
| AGE CLASS = Four classes: 1=18-30 - 2=31-50 - 3=51-65 - 4=>65 years of age                                       |                                                                                             |
| EDUCATION = Four level.: 1= primary – 2= secondary – 3= tertiary – 4= master                                     |                                                                                             |
| FLULAST = last seasonal flu vaccine received (uptake) yes / no                                                   |                                                                                             |

## VL mediating effects between antecedents and '3Cs' - Indirect and Total Effects

C.I. 95% computed with method: Standard (Delta method)

| Type                                        | DETERMINANT > VL > CONFIDENCE                          | Estimate | SE       | Lower    | Upper    | $\beta$  | z      | p     | %           |
|---------------------------------------------|--------------------------------------------------------|----------|----------|----------|----------|----------|--------|-------|-------------|
| Indirect                                    | EDUCATION $\Rightarrow$ FUVL $\Rightarrow$ CONFIDENCE  | 0,00589  | 0,00275  | 4,97E-04 | 0,01128  | 0,01083  | 2.141  | 0,032 | <b>0,11</b> |
|                                             | EDUCATION $\Rightarrow$ ICVL $\Rightarrow$ CONFIDENCE  | 0,01744  | 0,00474  | 0,00815  | 0,02674  | 0,03207  | 3.678  | <,001 | <b>0,32</b> |
|                                             | AGECLASS $\Rightarrow$ FUVL $\Rightarrow$ CONFIDENCE   | -7,27e-4 | 0,00199  | -0,00463 | 0,00318  | -0,00121 | -0,365 | 0,715 |             |
|                                             | AGECLASS $\Rightarrow$ ICVL $\Rightarrow$ CONFIDENCE   | 0,00747  | 0,00401  | -3,95e-4 | 0,01533  | 0,01241  | 1.861  | 0,063 |             |
|                                             | HCWORKER $\Rightarrow$ FUVL $\Rightarrow$ CONFIDENCE   | 0,02122  | 0,009    | 0,00359  | 0,03886  | 0,01372  | 2.358  | 0,018 |             |
| Component                                   | HCWORKER $\Rightarrow$ ICVL $\Rightarrow$ CONFIDENCE   | 0,02738  | 0,01116  | 0,0055   | 0,04927  | 0,0177   | 2.453  | 0,014 |             |
|                                             | EDUCATION $\Rightarrow$ FUVL                           | 0,07644  | 0,0241   | 0,0292   | 0,12368  | 0,11032  | 3.171  | 0,002 |             |
|                                             | FUVL $\Rightarrow$ CONFIDENCE                          | 0,07706  | 0,02656  | 0,02501  | 0,12912  | 0,09818  | 2.902  | 0,004 |             |
|                                             | EDUCATION $\Rightarrow$ ICVL                           | 0,08932  | 0,01817  | 0,05371  | 0,12492  | 0,16982  | 4.917  | <,001 |             |
|                                             | ICVL $\Rightarrow$ CONFIDENCE                          | 0,1953   | 0,03524  | 0,12623  | 0,26437  | 0,18887  | 5.542  | <,001 |             |
| Direct                                      | AGECLASS $\Rightarrow$ FUVL                            | -0,00944 | 0,02566  | -0,05974 | 0,04086  | -0,01231 | -0,368 | 0,713 |             |
|                                             | AGECLASS $\Rightarrow$ ICVL                            | 0,03823  | 0,01934  | 3,13E-04 | 0,07614  | 0,0657   | 1.976  | 0,048 |             |
|                                             | HCWORKER $\Rightarrow$ FUVL                            | 0,27539  | 0,06802  | 0,14208  | 0,4087   | 0,13971  | 4.049  | <,001 |             |
|                                             | HCWORKER $\Rightarrow$ ICVL                            | 0,14021  | 0,05127  | 0,03973  | 0,24068  | 0,0937   | 2.735  | 0,006 |             |
|                                             | EDUCATION $\Rightarrow$ CONFIDENCE                     | 0,03095  | 0,01897  | -0,00623 | 0,06813  | 0,05692  | 1.632  | 0,103 |             |
| Total                                       | AGECLASS $\Rightarrow$ CONFIDENCE                      | -0,04656 | 0,01991  | -0,08558 | -0,00754 | -0,0774  | -2.339 | 0,019 |             |
|                                             | HCWORKER $\Rightarrow$ CONFIDENCE                      | 0,03275  | 0,05326  | -0,07164 | 0,13714  | 0,02117  | 0,615  | 0,539 |             |
|                                             | EDUCATION $\Rightarrow$ CONFIDENCE                     | 0,05429  | 0,01914  | 0,01677  | 0,09181  | 0,09982  | 2.836  | 0,005 |             |
|                                             | AGECLASS $\Rightarrow$ CONFIDENCE                      | -0,03982 | 0,02038  | -0,07977 | 1,26E-04 | -0,0662  | -1.954 | 0,051 |             |
|                                             | HCWORKER $\Rightarrow$ CONFIDENCE                      | 0,08135  | 0,05402  | -0,02452 | 0,18723  | 0,05258  | 1.506  | 0,132 |             |
| <b>DETERMINANT &gt; VL &gt; COMPLACENCY</b> |                                                        |          |          |          |          |          |        |       |             |
| Indirect                                    | EDUCATION $\Rightarrow$ FUVL $\Rightarrow$ COMPLACENCY | 0,00195  | 0,00211  | -0,0022  | 0,00609  | 0,00366  | 0,921  | 0,357 |             |
|                                             | EDUCATION $\Rightarrow$ ICVL $\Rightarrow$ COMPLACENCY | 0,01208  | 0,00398  | 0,00427  | 0,01989  | 0,02272  | 3.033  | 0,002 | <b>0,25</b> |
|                                             | AGECLASS $\Rightarrow$ FUVL $\Rightarrow$ COMPLACENCY  | -2,40e-4 | 6,99E-04 | -0,00161 | 0,00113  | -4,08e-4 | -0,343 | 0,731 |             |
|                                             | AGECLASS $\Rightarrow$ ICVL $\Rightarrow$ COMPLACENCY  | 0,00517  | 0,00294  | -5,93e-4 | 0,01094  | 0,00879  | 1.758  | 0,079 |             |
|                                             | HCWORKER $\Rightarrow$ FUVL $\Rightarrow$ COMPLACENCY  | 0,00701  | 0,00749  | -0,00767 | 0,02169  | 0,00463  | 0,936  | 0,349 |             |
| Component                                   | HCWORKER $\Rightarrow$ ICVL $\Rightarrow$ COMPLACENCY  | 0,01897  | 0,0085   | 0,0023   | 0,03564  | 0,01254  | 2.230  | 0,026 |             |
|                                             | EDUCATION $\Rightarrow$ FUVL                           | 0,07644  | 0,0241   | 0,0292   | 0,12368  | 0,11032  | 3.171  | 0,002 |             |
|                                             | FUVL $\Rightarrow$ COMPLACENCY                         | 0,02546  | 0,02646  | -0,02641 | 0,07732  | 0,03317  | 0,962  | 0,336 |             |
|                                             | EDUCATION $\Rightarrow$ ICVL                           | 0,08932  | 0,01817  | 0,05371  | 0,12492  | 0,16982  | 4.917  | <,001 |             |
|                                             | ICVL $\Rightarrow$ COMPLACENCY                         | 0,13528  | 0,03511  | 0,06647  | 0,20409  | 0,13378  | 3.853  | <,001 |             |
| Direct                                      | AGECLASS $\Rightarrow$ FUVL                            | -0,00944 | 0,02566  | -0,05974 | 0,04086  | -0,01231 | -0,368 | 0,713 |             |
|                                             | AGECLASS $\Rightarrow$ ICVL                            | 0,03823  | 0,01934  | 3,13E-04 | 0,07614  | 0,0657   | 1.976  | 0,048 |             |
|                                             | HCWORKER $\Rightarrow$ FUVL                            | 0,27539  | 0,06802  | 0,14208  | 0,4087   | 0,13971  | 4.049  | <,001 |             |
|                                             | HCWORKER $\Rightarrow$ ICVL                            | 0,14021  | 0,05127  | 0,03973  | 0,24068  | 0,0937   | 2.735  | 0,006 |             |
|                                             | EDUCATION $\Rightarrow$ COMPLACENCY                    | 0,03454  | 0,0189   | -0,0025  | 0,07159  | 0,06495  | 1.828  | 0,068 |             |
| Total                                       | AGECLASS $\Rightarrow$ COMPLACENCY                     | 0,00567  | 0,01984  | -0,03321 | 0,04455  | 0,00964  | 0,286  | 0,775 |             |
|                                             | HCWORKER $\Rightarrow$ COMPLACENCY                     | 0,02687  | 0,05306  | -0,07713 | 0,13088  | 0,01776  | 0,506  | 0,613 |             |
|                                             | EDUCATION $\Rightarrow$ COMPLACENCY                    | 0,04857  | 0,01878  | 0,01177  | 0,08538  | 0,09133  | 2.587  | 0,01  |             |
|                                             | AGECLASS $\Rightarrow$ COMPLACENCY                     | 0,0106   | 0,02     | -0,02859 | 0,04979  | 0,01802  | 0,53   | 0,596 |             |
|                                             | HCWORKER $\Rightarrow$ COMPLACENCY                     | 0,05285  | 0,05299  | -0,05101 | 0,15671  | 0,03493  | 0,997  | 0,319 |             |
| <b>DETERMINANT &gt; VL &gt; CONVENIENCE</b> |                                                        |          |          |          |          |          |        |       |             |
| Indirect                                    | EDUCATION $\Rightarrow$ FUVL $\Rightarrow$ CONVENIENCE | -6,82e-4 | 0,0014   | -0,00342 | 0,00206  | -0,00188 | -0,488 | 0,626 |             |
|                                             | EDUCATION $\Rightarrow$ ICVL $\Rightarrow$ CONVENIENCE | 0,01103  | 0,0031   | 0,00495  | 0,01711  | 0,03037  | 3.557  | <,001 | <b>0,57</b> |
|                                             | AGECLASS $\Rightarrow$ FUVL $\Rightarrow$ CONVENIENCE  | 8,42E-05 | 2,85E-04 | -4,75e-4 | 6,44E-04 | 2,09E-04 | 0,295  | 0,768 |             |
|                                             | AGECLASS $\Rightarrow$ ICVL $\Rightarrow$ CONVENIENCE  | 0,00472  | 0,00256  | -2,94e-4 | 0,00974  | 0,01175  | 1.845  | 0,065 |             |
|                                             | HCWORKER $\Rightarrow$ FUVL $\Rightarrow$ CONVENIENCE  | -0,00246 | 0,00501  | -0,01228 | 0,00737  | -0,00238 | -0,49  | 0,624 |             |
| Component                                   | HCWORKER $\Rightarrow$ ICVL $\Rightarrow$ CONVENIENCE  | 0,01732  | 0,00717  | 0,00327  | 0,03137  | 0,01676  | 2.416  | 0,016 |             |
|                                             | EDUCATION $\Rightarrow$ FUVL                           | 0,07644  | 0,0241   | 0,0292   | 0,12368  | 0,11032  | 3.171  | 0,002 |             |
|                                             | FUVL $\Rightarrow$ CONVENIENCE                         | -0,00892 | 0,01806  | -0,04432 | 0,02649  | -0,01701 | -0,494 | 0,621 |             |
|                                             | EDUCATION $\Rightarrow$ ICVL                           | 0,08932  | 0,01817  | 0,05371  | 0,12492  | 0,16982  | 4.917  | <,001 |             |
|                                             | ICVL $\Rightarrow$ CONVENIENCE                         | 0,12351  | 0,02397  | 0,07654  | 0,17049  | 0,17885  | 5.154  | <,001 |             |
| Direct                                      | AGECLASS $\Rightarrow$ FUVL                            | -0,00944 | 0,02566  | -0,05974 | 0,04086  | -0,01231 | -0,368 | 0,713 |             |
|                                             | AGECLASS $\Rightarrow$ ICVL                            | 0,03823  | 0,01934  | 3,13E-04 | 0,07614  | 0,0657   | 1.976  | 0,048 |             |
|                                             | HCWORKER $\Rightarrow$ FUVL                            | 0,27539  | 0,06802  | 0,14208  | 0,4087   | 0,13971  | 4.049  | <,001 |             |
|                                             | HCWORKER $\Rightarrow$ ICVL                            | 0,14021  | 0,05127  | 0,03973  | 0,24068  | 0,0937   | 2.735  | 0,006 |             |
|                                             | EDUCATION $\Rightarrow$ CONVENIENCE                    | 0,00884  | 0,0129   | -0,01645 | 0,03413  | 0,02434  | 0,685  | 0,493 |             |
| Total                                       | AGECLASS $\Rightarrow$ CONVENIENCE                     | -0,00225 | 0,01354  | -0,02879 | 0,02429  | -0,00561 | -0,166 | 0,868 |             |
|                                             | HCWORKER $\Rightarrow$ CONVENIENCE                     | -0,03548 | 0,03622  | -0,10648 | 0,03551  | -0,03434 | -0,98  | 0,327 |             |
|                                             | EDUCATION $\Rightarrow$ CONVENIENCE                    | 0,01919  | 0,01289  | -0,00606 | 0,04445  | 0,05284  | 1.489  | 0,136 |             |
|                                             | AGECLASS $\Rightarrow$ CONVENIENCE                     | 0,00255  | 0,01372  | -0,02434 | 0,02944  | 0,00636  | 0,186  | 0,852 |             |
|                                             | HCWORKER $\Rightarrow$ CONVENIENCE                     | -0,02062 | 0,03636  | -0,09189 | 0,05064  | -0,01996 | -0,567 | 0,571 |             |

| '3Cs' mediating effects between VL and outcome - Indirect and Total Effects - C.I. 95% computed with method: Standard (Delta method) |                                      |          |         |          |          |          |        |       |             |
|--------------------------------------------------------------------------------------------------------------------------------------|--------------------------------------|----------|---------|----------|----------|----------|--------|-------|-------------|
| Type                                                                                                                                 | VL > CONFIDENCE > FLU VACCINE UPTAKE | Estimate | SE      | Lower    | Upper    | β        | z      | p     | %           |
| Indirect                                                                                                                             | FUVL ⇒ CONFIDENCE ⇒ FLULAST          | 0,0114   | 0,00448 | 0,00262  | 0,02018  | 0,0163   | 2.545  | 0,011 | <b>0,14</b> |
|                                                                                                                                      | ICVL ⇒ CONFIDENCE ⇒ FLULAST          | 0,02889  | 0,00754 | 0,01411  | 0,04367  | 0,03137  | 3.832  | <,001 | <b>0,37</b> |
|                                                                                                                                      | EDUCATION ⇒ CONFIDENCE ⇒ FLULAST     | 0,00458  | 0,00294 | -0,00118 | 0,01033  | 0,00945  | 1.560  | 0,119 |             |
|                                                                                                                                      | AGECLASS ⇒ CONFIDENCE ⇒ FLULAST      | -0,00689 | 0,00322 | -0,0132  | -5,79e-4 | -0,01285 | -2.140 | 0,032 |             |
|                                                                                                                                      | HCWORKER ⇒ CONFIDENCE ⇒ FLULAST      | 0,00484  | 0,00793 | -0,0107  | 0,02039  | 0,00351  | 0,611  | 0,541 |             |
| Component                                                                                                                            | FUVL ⇒ CONFIDENCE                    | 0,07706  | 0,02656 | 0,02501  | 0,12912  | 0,09818  | 2.902  | 0,004 |             |
|                                                                                                                                      | CONFIDENCE ⇒ FLULAST                 | 0,14792  | 0,02789 | 0,09325  | 0,20259  | 0,16607  | 5.303  | <,001 |             |
|                                                                                                                                      | ICVL ⇒ CONFIDENCE                    | 0,1953   | 0,03524 | 0,12623  | 0,26437  | 0,18887  | 5.542  | <,001 |             |
|                                                                                                                                      | EDUCATION ⇒ CONFIDENCE               | 0,03095  | 0,01897 | -0,00623 | 0,06813  | 0,05692  | 1.632  | 0,103 |             |
|                                                                                                                                      | AGECLASS ⇒ CONFIDENCE                | -0,04656 | 0,01991 | -0,08558 | -0,00754 | -0,0774  | -2.339 | 0,019 |             |
| Direct                                                                                                                               | HCWORKER ⇒ CONFIDENCE                | 0,03275  | 0,05326 | -0,07164 | 0,13714  | 0,02117  | 0,615  | 0,539 |             |
|                                                                                                                                      | FUVL ⇒ FLULAST                       | 0,06729  | 0,02197 | 0,02423  | 0,11035  | 0,09624  | 3.063  | 0,002 |             |
|                                                                                                                                      | ICVL ⇒ FLULAST                       | 0,04827  | 0,02952 | -0,00958 | 0,10612  | 0,05241  | 1.635  | 0,102 |             |
|                                                                                                                                      | EDUCATION ⇒ FLULAST                  | 0,01409  | 0,01564 | -0,01656 | 0,04475  | 0,02909  | 0,901  | 0,368 |             |
|                                                                                                                                      | AGECLASS ⇒ FLULAST                   | 0,18136  | 0,01644 | 0,14913  | 0,21358  | 0,33846  | 11.031 | <,001 |             |
| Total                                                                                                                                | HCWORKER ⇒ FLULAST                   | 0,20187  | 0,04385 | 0,11592  | 0,28782  | 0,14648  | 4.603  | <,001 |             |
|                                                                                                                                      | FUVL ⇒ FLULAST                       | 0,07869  | 0,02223 | 0,03512  | 0,12225  | 0,11254  | 3.540  | <,001 |             |
|                                                                                                                                      | ICVL ⇒ FLULAST                       | 0,07716  | 0,02949 | 0,01936  | 0,13496  | 0,08378  | 2.616  | 0,009 |             |
|                                                                                                                                      | EDUCATION ⇒ FLULAST                  | 0,01867  | 0,01588 | -0,01244 | 0,04979  | 0,03854  | 1.176  | 0,24  |             |
|                                                                                                                                      | AGECLASS ⇒ FLULAST                   | 0,17447  | 0,01666 | 0,14181  | 0,20713  | 0,32561  | 10.471 | <,001 |             |
|                                                                                                                                      | HCWORKER ⇒ FLULAST                   | 0,20672  | 0,04457 | 0,11936  | 0,29408  | 0,15     | 4.638  | <,001 |             |
| VL > COMPLACENCY > FLU VACCINE UPTAKE                                                                                                |                                      |          |         |          |          |          |        |       |             |
| Indirect                                                                                                                             | FUVL ⇒ COMPLACENCY ⇒ FLULAST         | 0,00376  | 0,00397 | -0,00402 | 0,01154  | 0,00537  | 0,946  | 0,344 |             |
|                                                                                                                                      | ICVL ⇒ COMPLACENCY ⇒ FLULAST         | 0,01997  | 0,00642 | 0,00739  | 0,03255  | 0,02168  | 3.111  | 0,002 | <b>0,26</b> |
|                                                                                                                                      | EDUCATION ⇒ COMPLACENCY ⇒ FLULAST    | 0,0051   | 0,00295 | -6,89e-4 | 0,01088  | 0,01052  | 1.727  | 0,084 |             |
|                                                                                                                                      | AGECLASS ⇒ COMPLACENCY ⇒ FLULAST     | 8,37E-04 | 0,00293 | -0,00491 | 0,00658  | 0,00156  | 0,285  | 0,775 |             |
|                                                                                                                                      | HCWORKER ⇒ COMPLACENCY ⇒ FLULAST     | 0,00397  | 0,00787 | -0,01145 | 0,01939  | 0,00288  | 0,504  | 0,614 |             |
| Component                                                                                                                            | FUVL ⇒ COMPLACENCY                   | 0,02546  | 0,02646 | -0,02641 | 0,07732  | 0,03317  | 0,962  | 0,336 |             |
|                                                                                                                                      | COMPLACENCY ⇒ FLULAST                | 0,14759  | 0,028   | 0,09271  | 0,20247  | 0,16204  | 5.271  | <,001 |             |
|                                                                                                                                      | ICVL ⇒ COMPLACENCY                   | 0,13528  | 0,03511 | 0,06647  | 0,20409  | 0,13378  | 3.853  | <,001 |             |
|                                                                                                                                      | EDUCATION ⇒ COMPLACENCY              | 0,03454  | 0,0189  | -0,0025  | 0,07159  | 0,06495  | 1.828  | 0,068 |             |
|                                                                                                                                      | AGECLASS ⇒ COMPLACENCY               | 0,00567  | 0,01984 | -0,03321 | 0,04455  | 0,00964  | 0,286  | 0,775 |             |
| Direct                                                                                                                               | HCWORKER ⇒ COMPLACENCY               | 0,02687  | 0,05306 | -0,07713 | 0,13088  | 0,01776  | 0,506  | 0,613 |             |
|                                                                                                                                      | FUVL ⇒ FLULAST                       | 0,07493  | 0,02188 | 0,03204  | 0,11781  | 0,10717  | 3.425  | <,001 |             |
|                                                                                                                                      | ICVL ⇒ FLULAST                       | 0,05719  | 0,02926 | -1,55e-4 | 0,11454  | 0,0621   | 1.955  | 0,051 |             |
|                                                                                                                                      | EDUCATION ⇒ FLULAST                  | 0,01357  | 0,01565 | -0,0171  | 0,04424  | 0,02802  | 0,867  | 0,386 |             |
|                                                                                                                                      | AGECLASS ⇒ FLULAST                   | 0,17363  | 0,01639 | 0,1415   | 0,20576  | 0,32404  | 10.592 | <,001 |             |
| Total                                                                                                                                | HCWORKER ⇒ FLULAST                   | 0,20275  | 0,04386 | 0,11679  | 0,28871  | 0,14712  | 4.623  | <,001 |             |
|                                                                                                                                      | FUVL ⇒ FLULAST                       | 0,07869  | 0,02223 | 0,03512  | 0,12225  | 0,11254  | 3.540  | <,001 |             |
|                                                                                                                                      | ICVL ⇒ FLULAST                       | 0,07716  | 0,02949 | 0,01936  | 0,13496  | 0,08378  | 2.616  | 0,009 |             |
|                                                                                                                                      | EDUCATION ⇒ FLULAST                  | 0,01867  | 0,01588 | -0,01244 | 0,04979  | 0,03854  | 1.176  | 0,24  |             |
|                                                                                                                                      | AGECLASS ⇒ FLULAST                   | 0,17447  | 0,01666 | 0,14181  | 0,20713  | 0,32561  | 10.471 | <,001 |             |
|                                                                                                                                      | HCWORKER ⇒ FLULAST                   | 0,20672  | 0,04457 | 0,11936  | 0,29408  | 0,15     | 4.638  | <,001 |             |
| VL > CONVENIENCE > FLU VACCINE UPTAKE                                                                                                |                                      |          |         |          |          |          |        |       |             |
| Indirect                                                                                                                             | FUVL ⇒ CONVENIENCE ⇒ FLULAST         | -0,00182 | 0,0037  | -0,00906 | 0,00543  | -0,0026  | -0,491 | 0,623 |             |
|                                                                                                                                      | ICVL ⇒ CONVENIENCE ⇒ FLULAST         | 0,02516  | 0,00704 | 0,01136  | 0,03896  | 0,02732  | 3.573  | <,001 | <b>0,33</b> |
|                                                                                                                                      | EDUCATION ⇒ CONVENIENCE ⇒ FLULAST    | 0,0018   | 0,00265 | -0,0034  | 0,007    | 0,00372  | 0,679  | 0,497 |             |
|                                                                                                                                      | AGECLASS ⇒ CONVENIENCE ⇒ FLULAST     | -4,59e-4 | 0,00276 | -0,00587 | 0,00495  | -8,56e-4 | -0,166 | 0,868 |             |
|                                                                                                                                      | HCWORKER ⇒ CONVENIENCE ⇒ FLULAST     | -0,00723 | 0,00752 | -0,02197 | 0,00751  | -0,00525 | -0,961 | 0,337 |             |
| Component                                                                                                                            | FUVL ⇒ CONVENIENCE                   | -0,00892 | 0,01806 | -0,04432 | 0,02649  | -0,01701 | -0,494 | 0,621 |             |
|                                                                                                                                      | CONVENIENCE ⇒ FLULAST                | 0,20371  | 0,04109 | 0,12317  | 0,28425  | 0,15275  | 4.957  | <,001 |             |
|                                                                                                                                      | ICVL ⇒ CONVENIENCE                   | 0,12351  | 0,02397 | 0,07654  | 0,17049  | 0,17885  | 5.154  | <,001 |             |
|                                                                                                                                      | EDUCATION ⇒ CONVENIENCE              | 0,00884  | 0,0129  | -0,01645 | 0,03413  | 0,02434  | 0,685  | 0,493 |             |
|                                                                                                                                      | AGECLASS ⇒ CONVENIENCE               | -0,00225 | 0,01354 | -0,02879 | 0,02429  | -0,00561 | -0,166 | 0,868 |             |
| Direct                                                                                                                               | HCWORKER ⇒ CONVENIENCE               | -0,03548 | 0,03622 | -0,10648 | 0,03551  | -0,03434 | -0,98  | 0,327 |             |
|                                                                                                                                      | FUVL ⇒ FLULAST                       | 0,0805   | 0,02191 | 0,03756  | 0,12345  | 0,11514  | 3.674  | <,001 |             |
|                                                                                                                                      | ICVL ⇒ FLULAST                       | 0,052    | 0,02951 | -0,00583 | 0,10983  | 0,05646  | 1.762  | 0,078 |             |
|                                                                                                                                      | EDUCATION ⇒ FLULAST                  | 0,01687  | 0,01565 | -0,01381 | 0,04755  | 0,03483  | 1.078  | 0,281 |             |
|                                                                                                                                      | AGECLASS ⇒ FLULAST                   | 0,17493  | 0,01642 | 0,14274  | 0,20712  | 0,32646  | 10.652 | <,001 |             |
| Total                                                                                                                                | HCWORKER ⇒ FLULAST                   | 0,21395  | 0,04395 | 0,1278   | 0,3001   | 0,15524  | 4.867  | <,001 |             |
|                                                                                                                                      | FUVL ⇒ FLULAST                       | 0,07869  | 0,02223 | 0,03512  | 0,12225  | 0,11254  | 3.540  | <,001 |             |
|                                                                                                                                      | ICVL ⇒ FLULAST                       | 0,07716  | 0,02949 | 0,01936  | 0,13496  | 0,08378  | 2.616  | 0,009 |             |
|                                                                                                                                      | EDUCATION ⇒ FLULAST                  | 0,01867  | 0,01588 | -0,01244 | 0,04979  | 0,03854  | 1.176  | 0,24  |             |
|                                                                                                                                      | AGECLASS ⇒ FLULAST                   | 0,17447  | 0,01666 | 0,14181  | 0,20713  | 0,32561  | 10.471 | <,001 |             |
|                                                                                                                                      | HCWORKER ⇒ FLULAST                   | 0,20672  | 0,04457 | 0,11936  | 0,29408  | 0,15     | 4.638  | <,001 |             |

| Single VL ITEMS mediating effects between ‘education’ and ‘3Cs’    |                               |          |         | Indirect and Total Effects |          |          |        |       |       |
|--------------------------------------------------------------------|-------------------------------|----------|---------|----------------------------|----------|----------|--------|-------|-------|
| Confidence intervals computed with method: Standard (Delta method) |                               |          |         |                            |          |          |        |       |       |
|                                                                    |                               |          |         | 95% C.I.                   |          |          |        |       |       |
| Type                                                               | Effect                        | Estimate | SE      | Lower                      | Upper    | β        | z      | P     | %     |
| Indirect                                                           | EDUCAT ⇒ ITEM1 ⇒ CONFIDENCE   | 0,00591  | 0,00441 | -0,0027                    | 0,01456  | 0,01088  | 1.339  | 0,181 | 0,10  |
|                                                                    | EDUCAT ⇒ ITEM2 ⇒ CONFIDENCE   | 0,00542  | 0,0039  | -0,0022                    | 0,01306  | 0,00998  | 1.391  | 0,164 | 0,09  |
|                                                                    | EDUCAT ⇒ ITEM3 ⇒ CONFIDENCE   | 0,00319  | 0,00287 | -0,0024                    | 0,00882  | 0,00587  | 1.110  | 0,267 | 0,06  |
|                                                                    | EDUCAT ⇒ ITEM4 ⇒ CONFIDENCE   | -0,0011  | 0,00206 | -0,0052                    | 0,00291  | -0,0021  | -0,546 | 0,585 | -0,02 |
| Component                                                          | EDUCAT ⇒ ITEM1                | 0,15063  | 0,02692 | 0,09786                    | 0,2034   | 0,18483  | 5.595  | <,001 |       |
|                                                                    | ITEM1 ⇒ CONFIDENCE            | 0,03922  | 0,02844 | -0,0165                    | 0,09496  | 0,05886  | 1.379  | 0,168 |       |
|                                                                    | EDUCAT ⇒ ITEM2                | 0,10542  | 0,02577 | 0,0549                     | 0,15593  | 0,1362   | 4.090  | <,001 |       |
|                                                                    | ITEM2 ⇒ CONFIDENCE            | 0,05142  | 0,03477 | -0,0167                    | 0,11956  | 0,07329  | 1.479  | 0,139 |       |
|                                                                    | EDUCAT ⇒ ITEM3                | 0,08004  | 0,02788 | 0,02539                    | 0,1347   | 0,09605  | 2.871  | 0,004 |       |
|                                                                    | ITEM3 ⇒ CONFIDENCE            | 0,03983  | 0,03308 | -0,025                     | 0,10467  | 0,06114  | 1.204  | 0,229 |       |
|                                                                    | EDUCAT ⇒ ITEM4                | 0,0725   | 0,0303  | 0,01312                    | 0,13188  | 0,08018  | 2.393  | 0,017 |       |
|                                                                    | ITEM4 ⇒ CONFIDENCE            | -0,0155  | 0,02768 | -0,0698                    | 0,03873  | -0,0259  | -0,561 | 0,575 |       |
| Direct                                                             | EDUCAT ⇒ CONFIDENCE           | 0,04413  | 0,01828 | 0,0083                     | 0,07996  | 0,08128  | 2.414  | 0,016 |       |
| Total                                                              | EDUCAT ⇒ CONFIDENCE           | 0,05752  | 0,01816 | 0,02193                    | 0,09311  | 0,10594  | 3.168  | 0,002 |       |
| Type                                                               | Effect                        | Estimate | SE      | Lower                      | Upper    | β        | z      | P     | %     |
| Indirect                                                           | EDUCAT ⇒ ITEM5 ⇒ CONFIDENCE   | 1,38E-04 | 0,00129 | -0,0024                    | 0,00266  | 2,54E-04 | 0,107  | 0,914 | 0,00  |
|                                                                    | EDUCAT ⇒ ITEM6 ⇒ CONFIDENCE   | 0,00248  | 0,002   | -0,0014                    | 0,0064   | 0,00457  | 1.239  | 0,215 | 0,04  |
|                                                                    | EDUCAT ⇒ ITEM7 ⇒ CONFIDENCE   | 0,00396  | 0,00293 | -0,0018                    | 0,0097   | 0,0073   | 1.354  | 0,176 | 0,07  |
|                                                                    | EDUCAT ⇒ ITEM8 ⇒ CONFIDENCE   | -4,76e-4 | 0,00351 | -0,0074                    | 0,00641  | -8,77e-4 | -0,136 | 0,892 | na    |
|                                                                    | EDUCAT ⇒ ITEM9 ⇒ CONFIDENCE   | -0,0073  | 0,00313 | -0,0134                    | -0,0011  | -0,0134  | -2.323 | 0,02  | -0,13 |
|                                                                    | EDUCAT ⇒ ITEM10 ⇒ CONFIDENCE  | 0,01163  | 0,00404 | 0,00372                    | 0,01955  | 0,02143  | 2.882  | 0,004 | 0,20  |
|                                                                    | EDUCAT ⇒ ITEM11 ⇒ CONFIDENCE  | 0,00262  | 0,0032  | -0,0036                    | 0,00889  | 0,00483  | 0,821  | 0,412 | 0,05  |
|                                                                    | EDUCAT ⇒ ITEM12 ⇒ CONFIDENCE  | 0,01136  | 0,00405 | 0,00342                    | 0,01929  | 0,02091  | 2.805  | 0,005 | 0,20  |
| Component                                                          | EDUCAT ⇒ ITEM5                | 0,0531   | 0,02822 | -0,0022                    | 0,10842  | 0,06312  | 1.882  | 0,06  |       |
|                                                                    | ITEM5 ⇒ CONFIDENCE            | 0,0026   | 0,02417 | -0,0448                    | 0,04996  | 0,00403  | 0,108  | 0,914 |       |
|                                                                    | EDUCAT ⇒ ITEM6                | 0,05943  | 0,02473 | 0,01096                    | 0,10789  | 0,08051  | 2.403  | 0,016 |       |
|                                                                    | ITEM6 ⇒ CONFIDENCE            | 0,04175  | 0,02886 | -0,0148                    | 0,09832  | 0,05675  | 1.447  | 0,148 |       |
|                                                                    | EDUCAT ⇒ ITEM7                | 0,08824  | 0,02462 | 0,03999                    | 0,1365   | 0,11963  | 3.584  | <,001 |       |
|                                                                    | ITEM7 ⇒ CONFIDENCE            | 0,0449   | 0,0307  | -0,0153                    | 0,10507  | 0,061    | 1.463  | 0,144 |       |
|                                                                    | EDUCAT ⇒ ITEM8                | 0,18483  | 0,03462 | 0,11698                    | 0,25269  | 0,17665  | 5.339  | <,001 |       |
|                                                                    | ITEM8 ⇒ CONFIDENCE            | -0,0026  | 0,01899 | -0,0398                    | 0,03465  | -0,005   | -0,136 | 0,892 |       |
|                                                                    | EDUCAT ⇒ ITEM9                | 0,13794  | 0,03494 | 0,06946                    | 0,20641  | 0,13156  | 3.948  | <,001 |       |
|                                                                    | ITEM9 ⇒ CONFIDENCE            | -0,0528  | 0,01836 | -0,0888                    | -0,0168  | -0,1019  | -2.873 | 0,004 |       |
|                                                                    | EDUCAT ⇒ ITEM10               | 0,09574  | 0,0191  | 0,05831                    | 0,13318  | 0,16615  | 5.013  | <,001 |       |
|                                                                    | ITEM10 ⇒ CONFIDENCE           | 0,12151  | 0,0345  | 0,0539                     | 0,18912  | 0,12896  | 3.522  | <,001 |       |
|                                                                    | EDUCAT ⇒ ITEM11               | 0,11658  | 0,02717 | 0,06333                    | 0,16982  | 0,14277  | 4.291  | <,001 |       |
|                                                                    | ITEM11 ⇒ CONFIDENCE           | 0,02251  | 0,02693 | -0,0303                    | 0,07529  | 0,03386  | 0,836  | 0,403 |       |
|                                                                    | EDUCAT ⇒ ITEM12               | 0,13187  | 0,03124 | 0,07064                    | 0,19309  | 0,14049  | 4.221  | <,001 |       |
|                                                                    | ITEM12 ⇒ CONFIDENCE           | 0,08611  | 0,02294 | 0,04115                    | 0,13107  | 0,14886  | 3.754  | <,001 |       |
| Direct                                                             | EDUCAT ⇒ CONFIDENCE           | 0,03308  | 0,01793 | -0,0021                    | 0,06822  | 0,06092  | 1.845  | 0,065 |       |
| Total                                                              | EDUCAT ⇒ CONFIDENCE           | 0,05752  | 0,01816 | 0,02193                    | 0,09311  | 0,10594  | 3.168  | 0,002 |       |
| Type                                                               | Effect                        | Estimate | SE      | Lower                      | Upper    | β        | z      | P     | %     |
| Indirect                                                           | EDUCAT ⇒ ITEM1 ⇒ COMPLACENCY  | 0,00232  | 0,00423 | -0,006                     | 0,01061  | 0,00438  | 0,549  | 0,583 | 0,04  |
|                                                                    | EDUCAT ⇒ ITEM2 ⇒ COMPLACENCY  | 0,00836  | 0,00414 | 2,43E-04                   | 0,01647  | 0,01577  | 2.019  | 0,044 | 0,16  |
|                                                                    | EDUCAT ⇒ ITEM3 ⇒ COMPLACENCY  | -4,48e-4 | 0,00261 | -0,0056                    | 0,00466  | -8,46e-4 | -0,172 | 0,863 | na    |
|                                                                    | EDUCAT ⇒ ITEM4 ⇒ COMPLACENCY  | -0,0024  | 0,00221 | -0,0067                    | 0,00195  | -0,0045  | -1.077 | 0,281 | -0,04 |
| Component                                                          | EDUCAT ⇒ ITEM1                | 0,15063  | 0,02692 | 0,09786                    | 0,2034   | 0,18483  | 5.595  | <,001 |       |
|                                                                    | ITEM1 ⇒ COMPLACENCY           | 0,01541  | 0,02794 | -0,0394                    | 0,07018  | 0,0237   | 0,552  | 0,581 |       |
|                                                                    | EDUCAT ⇒ ITEM2                | 0,10542  | 0,02577 | 0,0549                     | 0,15593  | 0,1362   | 4.090  | <,001 |       |
|                                                                    | ITEM2 ⇒ COMPLACENCY           | 0,07928  | 0,03416 | 0,01234                    | 0,14622  | 0,11579  | 2.321  | 0,02  |       |
|                                                                    | EDUCAT ⇒ ITEM3                | 0,08004  | 0,02788 | 0,02539                    | 0,1347   | 0,09605  | 2.871  | 0,004 |       |
|                                                                    | ITEM3 ⇒ COMPLACENCY           | -0,0056  | 0,0325  | -0,0693                    | 0,0581   | -0,0088  | -0,172 | 0,863 |       |
|                                                                    | EDUCAT ⇒ ITEM4                | 0,0725   | 0,0303  | 0,01312                    | 0,13188  | 0,08018  | 2.393  | 0,017 |       |
|                                                                    | ITEM4 ⇒ COMPLACENCY           | -0,0328  | 0,02719 | -0,0861                    | 0,02048  | -0,056   | -1.207 | 0,228 |       |
| Direct                                                             | EDUCAT ⇒ COMPLACENCY          | 0,04528  | 0,01796 | 0,01008                    | 0,08048  | 0,08544  | 2.521  | 0,012 |       |
| Total                                                              | EDUCAT ⇒ COMPLACENCY          | 0,05313  | 0,01773 | 0,01837                    | 0,08789  | 0,10026  | 2.996  | 0,003 |       |
| Type                                                               | Effect                        | Estimate | SE      | Lower                      | Upper    | β        | z      | P     | %     |
| Indirect                                                           | EDUCAT ⇒ ITEM5 ⇒ COMPLACENCY  | 6,52E-04 | 0,00132 | -0,0019                    | 0,00324  | 0,00123  | 0,493  | 0,622 | 0,01  |
|                                                                    | EDUCAT ⇒ ITEM6 ⇒ COMPLACENCY  | 0,00137  | 0,0018  | -0,0022                    | 0,0049   | 0,00259  | 0,764  | 0,445 | 0,03  |
|                                                                    | EDUCAT ⇒ ITEM7 ⇒ COMPLACENCY  | 0,00404  | 0,00292 | -0,0017                    | 0,00976  | 0,00762  | 1.384  | 0,166 | 0,08  |
|                                                                    | EDUCAT ⇒ ITEM8 ⇒ COMPLACENCY  | -0,0016  | 0,0035  | -0,0084                    | 0,00529  | -0,003   | -0,45  | 0,652 | -0,03 |
|                                                                    | EDUCAT ⇒ ITEM9 ⇒ COMPLACENCY  | -0,0044  | 0,00276 | -0,0098                    | 9,87E-04 | -0,0083  | -1.602 | 0,109 | -0,08 |
|                                                                    | EDUCAT ⇒ ITEM10 ⇒ COMPLACENCY | 0,01258  | 0,00413 | 0,00448                    | 0,02068  | 0,02374  | 3.044  | 0,002 | 0,24  |
|                                                                    | EDUCAT ⇒ ITEM11 ⇒ COMPLACENCY | -0,0043  | 0,00328 | -0,0108                    | 0,0021   | -0,0082  | -1.319 | 0,187 | -0,08 |
|                                                                    | EDUCAT ⇒ ITEM12 ⇒ COMPLACENCY | 0,00872  | 0,00365 | 0,00157                    | 0,01587  | 0,01646  | 2.390  | 0,017 | 0,16  |
| Component                                                          | EDUCAT ⇒ ITEM5                | 0,0531   | 0,02822 | -0,0022                    | 0,10842  | 0,06312  | 1.881  | 0,06  |       |
|                                                                    | ITEM5 ⇒ COMPLACENCY           | 0,01228  | 0,02402 | -0,0348                    | 0,05937  | 0,0195   | 0,511  | 0,609 |       |

|           |                               |          |         |          |          |          |         |       |              |
|-----------|-------------------------------|----------|---------|----------|----------|----------|---------|-------|--------------|
|           | EDUCAT ⇒ ITEM6                | 0,05943  | 0,02473 | 0,01096  | 0,10789  | 0,08051  | 2.403   | 0,016 |              |
|           | ITEM6 ⇒ COMPLACENCY           | 0,02313  | 0,02869 | -0,0331  | 0,07937  | 0,03222  | 0,806   | 0,42  |              |
|           | EDUCAT ⇒ ITEM7                | 0,08824  | 0,02462 | 0,03999  | 0,1365   | 0,11963  | 3.584   | <,001 |              |
|           | ITEM7 ⇒ COMPLACENCY           | 0,04577  | 0,03052 | -0,014   | 0,10559  | 0,06371  | 1.500   | 0,134 |              |
|           | EDUCAT ⇒ ITEM8                | 0,18483  | 0,03462 | 0,11698  | 0,25269  | 0,17665  | 5.339   | <,001 |              |
|           | ITEM8 ⇒ COMPLACENCY           | -0,0085  | 0,01888 | -0,0455  | 0,02847  | -0,0169  | -0,452  | 0,651 |              |
|           | EDUCAT ⇒ ITEM9                | 0,13794  | 0,03494 | 0,06946  | 0,20641  | 0,13156  | 3.948   | <,001 |              |
|           | ITEM9 ⇒ COMPLACENCY           | -0,032   | 0,01826 | -0,0678  | 0,00379  | -0,0633  | -1.752  | 0,08  |              |
|           | EDUCAT ⇒ ITEM10               | 0,09574  | 0,0191  | 0,05831  | 0,13318  | 0,16615  | 5.013   | <,001 |              |
|           | ITEM10 ⇒ COMPLACENCY          | 0,13142  | 0,03429 | 0,0642   | 0,19864  | 0,1429   | 3.832   | <,001 |              |
|           | EDUCAT ⇒ ITEM11               | 0,11658  | 0,02717 | 0,06333  | 0,16982  | 0,14277  | 4.291   | <,001 |              |
|           | ITEM11 ⇒ COMPLACENCY          | -0,0371  | 0,02677 | -0,0896  | 0,01536  | -0,0572  | -1.386  | 0,166 |              |
|           | EDUCAT ⇒ ITEM12               | 0,13187  | 0,03124 | 0,07064  | 0,19309  | 0,14049  | 4.221   | <,001 |              |
|           | ITEM12 ⇒ COMPLACENCY          | 0,06613  | 0,0228  | 0,02144  | 0,11083  | 0,11714  | 2.900   | 0,004 |              |
| Direct    | EDUCAT ⇒ COMPLACENCY          | 0,03608  | 0,01783 | 0,00114  | 0,07101  | 0,06808  | 2.024   | 0,043 |              |
| Total     | EDUCAT ⇒ COMPLACENCY          | 0,05313  | 0,01773 | 0,01837  | 0,08789  | 0,10026  | 2.996   | 0,003 |              |
| Type      | Effect                        | Estimate | SE      | Lower    | Upper    | β        | z       | P     | %            |
| Indirect  | EDUCAT ⇒ ITEM1 ⇒ CONVENIENCE  | 0,00355  | 0,00299 | -0,0023  | 0,0094   | 0,00973  | 1.190   | 0,234 | <b>0,19</b>  |
|           | EDUCAT ⇒ ITEM2 ⇒ CONVENIENCE  | 0,00102  | 0,00251 | -0,0039  | 0,00594  | 0,00281  | 0,409   | 0,683 | <b>0,05</b>  |
|           | EDUCAT ⇒ ITEM3 ⇒ CONVENIENCE  | 0,00149  | 0,00188 | -0,0022  | 0,00516  | 0,00407  | 0,792   | 0,428 | <b>0,08</b>  |
|           | EDUCAT ⇒ ITEM4 ⇒ CONVENIENCE  | -0,0031  | 0,00188 | -0,0068  | 5,93E-04 | -0,0085  | -1.644  | 0,1   | <b>-0,16</b> |
| Component | EDUCAT ⇒ ITEM1                | 0,15063  | 0,02692 | 0,09786  | 0,2034   | 0,18483  | 5.595   | <,001 |              |
|           | ITEM1 ⇒ CONVENIENCE           | 0,02359  | 0,01937 | -0,0144  | 0,06155  | 0,05263  | 1.218   | 0,223 |              |
|           | EDUCAT ⇒ ITEM2                | 0,10542  | 0,02577 | 0,0549   | 0,15593  | 0,1362   | 4.090   | <,001 |              |
|           | ITEM2 ⇒ CONVENIENCE           | 0,00972  | 0,02367 | -0,0367  | 0,05612  | 0,0206   | 0,411   | 0,681 |              |
|           | EDUCAT ⇒ ITEM3                | 0,08004  | 0,02788 | 0,02539  | 0,1347   | 0,09605  | 2.871   | 0,004 |              |
|           | ITEM3 ⇒ CONVENIENCE           | 0,01856  | 0,02252 | -0,0256  | 0,0627   | 0,04234  | 0,824   | 0,41  |              |
|           | EDUCAT ⇒ ITEM4                | 0,0725   | 0,0303  | 0,01312  | 0,13188  | 0,08018  | 2.393   | 0,017 |              |
|           | ITEM4 ⇒ CONVENIENCE           | -0,0427  | 0,01885 | -0,0796  | -0,0057  | -0,1056  | -2.263  | 0,024 |              |
| Direct    | EDUCAT ⇒ CONVENIENCE          | 0,01609  | 0,01245 | -0,0083  | 0,04048  | 0,04404  | 1.292   | 0,196 |              |
| Total     | EDUCAT ⇒ CONVENIENCE          | 0,01906  | 0,01227 | -0,005   | 0,04311  | 0,05217  | 1.553   | 0,12  |              |
| Type      | Effect                        | Estimate | SE      | Lower    | Upper    | β        | z       | P     | %            |
| Indirect  | EDUCAT ⇒ ITEM5 ⇒ CONVENIENCE  | -0,0014  | 0,00116 | -0,0037  | 8,50E-04 | -0,0039  | -12.256 | 0,22  | <b>-0,07</b> |
|           | EDUCAT ⇒ ITEM6 ⇒ CONVENIENCE  | -0,0019  | 0,00141 | -0,0046  | 8,88E-04 | -0,0051  | -13.292 | 0,184 | <b>-0,10</b> |
|           | EDUCAT ⇒ ITEM7 ⇒ CONVENIENCE  | 0,00427  | 0,0022  | -4,77e-5 | 0,00859  | 0,01169  | 19.383  | 0,053 | <b>0,22</b>  |
|           | EDUCAT ⇒ ITEM8 ⇒ CONVENIENCE  | -2,79e-4 | 0,0024  | -0,005   | 0,00443  | -7,64e-4 | -0,1162 | 0,908 | <b>na</b>    |
|           | EDUCAT ⇒ ITEM9 ⇒ CONVENIENCE  | 0,00193  | 0,0018  | -0,0016  | 0,00546  | 0,00528  | 10.722  | 0,284 | <b>0,10</b>  |
|           | EDUCAT ⇒ ITEM10 ⇒ CONVENIENCE | 0,00606  | 0,00256 | 0,00104  | 0,01108  | 0,01658  | 23.646  | 0,018 | <b>0,32</b>  |
|           | EDUCAT ⇒ ITEM11 ⇒ CONVENIENCE | -3,37e-5 | 0,00215 | -0,0042  | 0,00417  | -9,22e-5 | -0,0157 | 0,987 | <b>na</b>    |
|           | EDUCAT ⇒ ITEM12 ⇒ CONVENIENCE | 0,00887  | 0,00295 | 0,00309  | 0,01465  | 0,02429  | 30.084  | 0,003 | <b>0,47</b>  |
| Component | EDUCAT ⇒ ITEM5                | 0,0531   | 0,02822 | -0,0022  | 0,10842  | 0,06312  | 18.815  | 0,06  |              |
|           | ITEM5 ⇒ CONVENIENCE           | -0,0267  | 0,01653 | -0,0591  | 0,0057   | -0,0615  | -16.153 | 0,106 |              |
|           | EDUCAT ⇒ ITEM6                | 0,05943  | 0,02473 | 0,01096  | 0,10789  | 0,08051  | 24.030  | 0,016 |              |
|           | ITEM6 ⇒ CONVENIENCE           | -0,0315  | 0,01974 | -0,0702  | 0,00719  | -0,0636  | -15.956 | 0,111 |              |
|           | EDUCAT ⇒ ITEM7                | 0,08824  | 0,02462 | 0,03999  | 0,1365   | 0,11963  | 35.845  | <,001 |              |
|           | ITEM7 ⇒ CONVENIENCE           | 0,04838  | 0,021   | 0,00723  | 0,08954  | 0,0977   | 23.043  | 0,021 |              |
|           | EDUCAT ⇒ ITEM8                | 0,18483  | 0,03462 | 0,11698  | 0,25269  | 0,17665  | 53.390  | <,001 |              |
|           | ITEM8 ⇒ CONVENIENCE           | -0,0015  | 0,01299 | -0,027   | 0,02395  | -0,0043  | -0,1162 | 0,907 |              |
|           | EDUCAT ⇒ ITEM9                | 0,13794  | 0,03494 | 0,06946  | 0,20641  | 0,13156  | 39.480  | <,001 |              |
|           | ITEM9 ⇒ CONVENIENCE           | 0,01399  | 0,01256 | -0,0106  | 0,03861  | 0,04016  | 11.141  | 0,265 |              |
|           | EDUCAT ⇒ ITEM10               | 0,09574  | 0,0191  | 0,05831  | 0,13318  | 0,16615  | 50.126  | <,001 |              |
|           | ITEM10 ⇒ CONVENIENCE          | 0,06327  | 0,0236  | 0,01703  | 0,10952  | 0,09981  | 26.817  | 0,007 |              |
|           | EDUCAT ⇒ ITEM11               | 0,11658  | 0,02717 | 0,06333  | 0,16982  | 0,14277  | 42.912  | <,001 |              |
|           | ITEM11 ⇒ CONVENIENCE          | -2,89e-4 | 0,01842 | -0,0364  | 0,03581  | -6,46e-4 | -0,0157 | 0,987 |              |
|           | EDUCAT ⇒ ITEM12               | 0,13187  | 0,03124 | 0,07064  | 0,19309  | 0,14049  | 42.212  | <,001 |              |
|           | ITEM12 ⇒ CONVENIENCE          | 0,06729  | 0,01569 | 0,03654  | 0,09804  | 0,1729   | 42.886  | <,001 |              |
| Direct    | EDUCAT ⇒ CONVENIENCE          | 0,00153  | 0,01226 | -0,0225  | 0,02557  | 0,00419  | 0,1247  | 0,901 |              |
| Total     | EDUCAT ⇒ CONVENIENCE          | 0,01906  | 0,01227 | -0,005   | 0,04311  | 0,05217  | 15.533  | 0,12  |              |

PCA: reduction of items on the 2020 data series (N= 885)[20], and reliability tests

**a) entering 19 items overall**

Kaiser-Meyer- Olkin Measure of Sampling Adequacy. 0,834 - Bartlett's Test of Sphericity ChiSquare 5677,360 P=0,00

| Component | Total Variance Explained |               |              |
|-----------|--------------------------|---------------|--------------|
|           | Initial Eigenvalues      |               |              |
|           | Total                    | % of Variance | Cumulative % |
| 1         | 4,351                    | 22,899        | 22,899       |
| 2         | 2,901                    | 15,269        | 38,168       |
| 3         | 2,318                    | 12,200        | 50,369       |
| 4         | 1,153                    | 6,069         | 56,438       |
| 5         | 1,021                    | 5,376         | 61,814       |
| 6         | 0,859                    | 4,520         | 66,334       |
| 7         | 0,773                    | 4,070         | 70,404       |
| 8         | 0,690                    | 3,632         | 74,036       |
| 9         | 0,618                    | 3,254         | 77,291       |
| 10        | 0,606                    | 3,188         | 80,478       |
| 11        | 0,556                    | 2,924         | 83,402       |
| 12        | 0,528                    | 2,776         | 86,179       |
| 13        | 0,501                    | 2,635         | 88,814       |
| 14        | 0,451                    | 2,372         | 91,186       |
| 15        | 0,427                    | 2,250         | 93,435       |
| 16        | 0,365                    | 1,922         | 95,357       |
| 17        | 0,322                    | 1,696         | 97,053       |
| 18        | 0,283                    | 1,488         | 98,541       |
| 19        | 0,277                    | 1,459         | 100,000      |

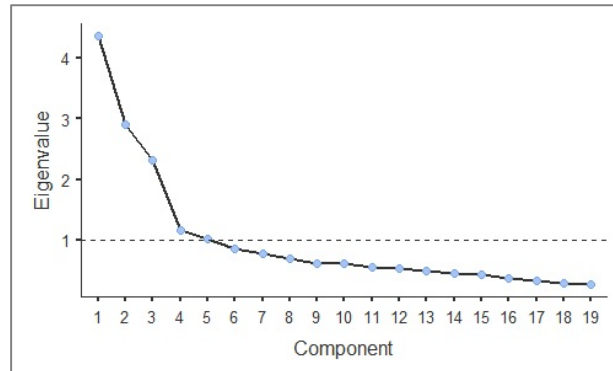

| Fit measures |        |        | RMSEA 90% CI |        |
|--------------|--------|--------|--------------|--------|
| CFI          | SRMR   | RMSEA  | Lower        | Upper  |
| 0.919        | 0.0525 | 0.0589 | 0.0540       | 0.0639 |

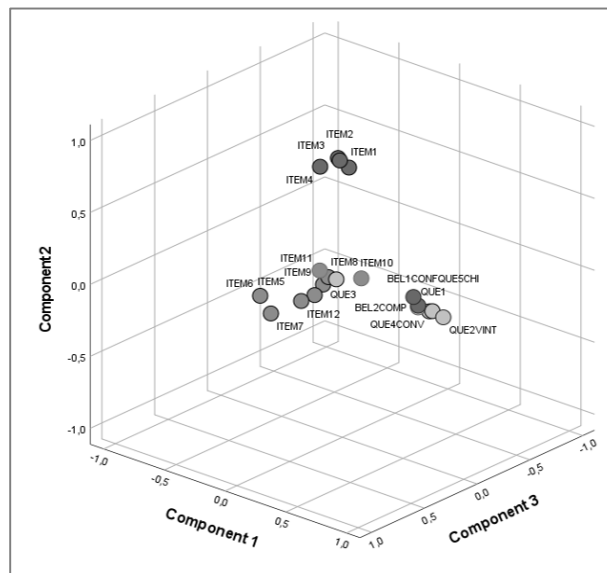

Component plot in rotated space

**Cronbach's  $\alpha$  0.785 McDonald's  $\omega$  0.806**

| Item Reliability Statistics |                     |                     |
|-----------------------------|---------------------|---------------------|
|                             | If item dropped     |                     |
|                             | Cronbach's $\alpha$ | McDonald's $\omega$ |
| ITEM1                       | 0.756               | 0.791               |
| ITEM2                       | 0.748               | 0.787               |
| ITEM3                       | 0.752               | 0.789               |
| ITEM4                       | 0.756               | 0.791               |
| ITEM5                       | 0.756               | 0.790               |
| ITEM7                       | 0.747               | 0.783               |
| ITEM8                       | 0.761               | 0.793               |
| ITEM9                       | 0.770               | 0.796               |
| ITEM10                      | 0.757               | 0.788               |
| ITEM11                      | 0.743               | 0.782               |
| ITEM12                      | 0.741               | 0.779               |
| QUE1                        | 0.766               | 0.787               |
| INTENTION                   | 0.763               | 0.777               |
| QUE3                        | 0.766               | 0.796               |
| CONVENIENCE                 | 0.762               | 0.782               |
| QUE5CHI                     | 0.764               | 0.783               |
| CONFIDENCE                  | 0.755               | 0.775               |
| COMPLACENCY                 | 0.760               | 0.780               |

**b) entering six items overall**

Kaiser-Meyer-Olkin Measure of Sampling Adequacy.0,744 - Bartlett's Test of Sphericity Chi-Square 1393,236, P=0,00

| Component | Total Variance Explained |               |              |
|-----------|--------------------------|---------------|--------------|
|           | Initial Eigenvalues      |               |              |
|           | Total                    | % of Variance | Cumulative % |
| 1         | 2.719                    | 45.31         | 45.3         |
| 2         | 1.087                    | 18.11         | 63.4         |
| 3         | 0.837                    | 13.95         | 77.4         |
| 4         | 0.651                    | 10.85         | 88.2         |
| 5         | 0.385                    | 6.42          | 94.6         |
| 6         | 0.321                    | 5.35          | 100.0        |

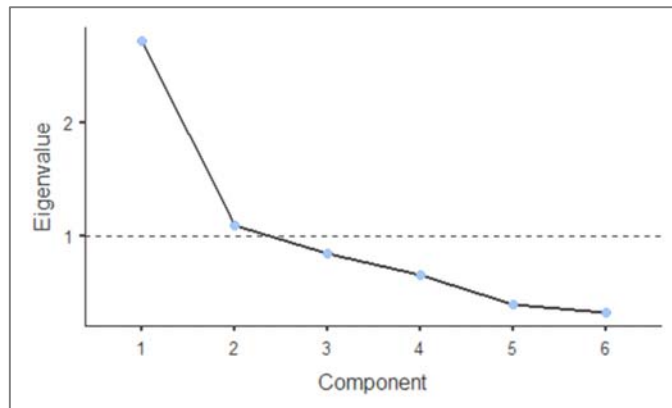

| Cronbach's $\alpha$ 0.602 McDonald's $\omega$ 0.749 |                     |                     |
|-----------------------------------------------------|---------------------|---------------------|
| Item Reliability Statistics                         |                     |                     |
|                                                     | If item dropped     |                     |
|                                                     | Cronbach's $\alpha$ | McDonald's $\omega$ |
| ITEM2                                               | 0.647               | 0.787               |
| ITEM12                                              | 0.623               | 0.763               |
| INTENTION                                           | 0.550               | 0.671               |
| CONVENIENCE                                         | 0.553               | 0.710               |
| CONFIDENCE                                          | 0.474               | 0.663               |
| COMPLACENCY                                         | 0.504               | 0.677               |

| Fit Measures |        |        | RMSEA 90% CI |        |
|--------------|--------|--------|--------------|--------|
| CFI          | SRMR   | RMSEA  | Lower        | Upper  |
| 0.984        | 0.0221 | 0.0653 | 0.0425       | 0.0902 |

| Fit measures[50]                        |       | acceptable fit |
|-----------------------------------------|-------|----------------|
| Comparative Fit Index                   | CFI   | >.95           |
| Standardized Root Mean Square Residual  | SRMR  | < .08          |
| Root Mean Square Error of Approximation | RMSEA | < .08 or < .05 |

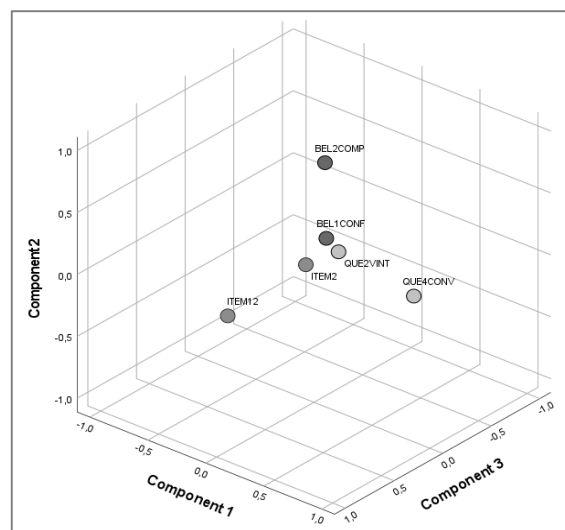

Component plot in rotated space
